# 1 Entire genome transcription across evolutionary time exposes non-coding DNA 2 to *de novo* gene emergence

3

4 Rafik Neme and Diethard Tautz\*

5 Max-Planck Institute for Evolutionary Biology, August-Thienemann-Strasse 2, 24306 Plön, Germany

6 \* corresponding author: tautz@evolbio.mpg.de

7

8 **Even in the best studied Mammalian genomes, less than 5% of the total genome length is annotated as exonic.**  
9 **However, deep sequencing analysis in humans has shown that around 40% of the genome may be covered by**  
10 **poly-adenylated non-coding transcripts occurring at low levels<sup>1</sup>. Their functional significance is unclear<sup>2,3</sup>, and**  
11 **there has been a dispute whether they should be considered as noise of the transcriptional machinery<sup>4,5</sup>. We**  
12 **propose that if such transcripts show some evolutionary stability they will serve as substrates for *de novo* gene**  
13 **evolution, i.e. gene emergence out of non-coding DNA<sup>6-8</sup>. Here, we characterize the phylogenetic turnover of**  
14 **low-level poly-adenylated transcripts in a comprehensive sampling of populations, sub-species and species of**  
15 **the genus *Mus*, spanning a phylogenetic distance of about 10 Myr. We find evidence for more evolutionary**  
16 **stable gains of transcription than losses among closely related taxa, balanced by a loss of older transcripts across**  
17 **the whole phylogeny. We show that adding taxa increases the genomic transcript coverage and that no major**  
18 **transcript-free islands exist over time. This suggests that the entire genome can be transcribed into poly-**  
19 **adenylated RNA when viewed at an evolutionary time scale. Thus, any part of the "non-coding" genome can**  
20 **become subject to evolutionary functionalization via *de novo* gene evolution.**

21 Genes can emerge *de novo* from non-genic regions of the genome<sup>9-11</sup>. Newly arising transcripts are initially usually  
22 non-coding, can later acquire functional open reading frames<sup>12-14</sup> and can quickly become essential<sup>15</sup>. A number of  
23 possibilities have been discussed by which new transcripts can arise, including single mutational events<sup>10</sup>,  
24 stabilization of bi-directional transcription<sup>16</sup> and insertion of transposable elements with promotor activity<sup>17</sup>. These  
25 events were initially thought to be rare<sup>6</sup>, but an increasing number of studies show that *de novo* gene emergence  
26 is a rather active mechanism<sup>18-22</sup>. Surveys across phylogenetic times have shown that the highest gene emergence  
27 rates are found in youngest taxa<sup>7</sup>. This led to the prediction that high emergence rates must be balanced with high  
28 loss rates, because gene numbers do not grow much over time<sup>7</sup>. A comparison of open reading frame turnover  
29 rates of *de novo* evolved genes among *Drosophila* species has shown that this is indeed the case<sup>22</sup>.

30 Here we assessed the numbers of new transcript gains in a comprehensive phylogenetic framework. Given that the  
31 emergence of a new stable transcript is a prerequisite for evolving a new functional gene, we expect that the  
32 transcript emergence rate is a key parameter in the process of *de novo* gene emergence. Stable transcripts can be

33 created out of combinations of cryptic functional sites, including a minimal promoter, splicing signals and poly-  
34 adenylation sites. This applies to completely new transcripts and to modification of existing transcripts by adding  
35 new exons from non-coding DNA. Given the widespread presence of cryptic functional sites in genome sequences,  
36 a single mutational step can convert a non-transcribed or a spuriously transcribed genome region into a stable  
37 transcript, as has been shown for *Pldj*, the first documented *de novo* gene in the mouse<sup>10</sup>.

38 Importantly, once a genomic region becomes transcribed, most subsequent mutations within the transcribed  
39 region will not lead to a loss of the transcript, since only a few sites are responsible for active and stable  
40 transcription. Hence, one can predict that the *de novo* transcript emergence dynamics would show a higher rate of  
41 gain than loss at short evolutionary time scales. Hence, transcriptional gain would constitute a powerful  
42 mechanism to continuously expose new genome regions to evolutionary testing, providing the fuel for *de novo*  
43 gene emergence.

44 To test this prediction, we selected species, subspecies and populations related to the house mouse (*Mus*  
45 *musculus* - suppl. Table S1) as a phylogenetic framework for identifying the emergence and loss of new transcripts.  
46 The taxa chosen span approximately 10.5 Myr of evolutionary divergence and represent up to ~5.6% overall  
47 genomic divergence (Figure 1, suppl. Table S2). Using such closely related taxa ensures that most neutrally evolving  
48 sequences can be reliably mapped across all species<sup>23</sup>. We generated genome sequences for species without  
49 published genomes, and transcriptome sequences for brain, liver and testis for all taxa (suppl. Tables S3-S5).

50 For comparative transcriptome analysis, we identified all mappable regions of the *M. m. domesticus* reference  
51 genome (C57Bl/6)<sup>24</sup> using genomic reads from all studied species. We call this the "common genome",  
52 representing the total genome where transcript mapping across taxa is reliable. We used a mapping algorithm that  
53 was specifically designed to deal with the polymorphisms occurring under cross-species mapping conditions<sup>23</sup>.

54 We first focused on genome-wide signals of transcriptional activity to identify the origin of new transcripts within  
55 the phylogeny (suppl. Table S8). For this purpose, we determined the base-wise transcriptome coverage from poly-  
56 adenylation RNA for each species. This measure of coverage includes both annotated genes and previously un-  
57 annotated transcripts, whereby the latter are the majority. We set single read coverage as the lower cutoff  
58 because we were specifically interested in detecting low-level transcription as an early sign of *de novo* gene  
59 emergence. However, we also report results using a stringent cutoff of five reads for comparison (the median  
60 coverage across all transcripts is 3.7).

61 When comparing transcriptome coverage among taxa, we find that the overall proportion of shared transcripts is  
62 higher for closely related taxa than for distantly related pairs. Consequently, a phylogenetic tree reconstructed  
63 based on shared transcript coverage mirrors the species tree (Figure 1B, C). This detectable phylogenetic signal in

64 transcription coverage suggests that transcripts gained at a given point in evolutionary time are sufficiently stable  
65 to be retained in sister taxa, implying that they can become exposed to evolutionary testing.

66 The total transcript coverage of the common genome across all species combined for all three tissues is 67% in our  
67 data set. Coverage was highest in testis (53.4%), intermediate in brain (41.5%) and lowest in liver (23.5%) (Figure  
68 2A). When comparing all transcriptional gains versus losses across the surveyed phylogeny, we observe that gains  
69 are indeed more frequent than losses (Figure 2B, C), thus confirming our initial hypothesis.

70 Recording base-wise coverage without paying attention to gene models entails the risk that one is also measuring  
71 transcriptomic noise, i.e. spurious random transcriptional initiation in a subset of cells of the tissue under  
72 investigation. We have specifically explored the noise issue through deeper sequencing of the brain samples of all  
73 taxa. The brain is a complex tissue in which some transcripts are expected to occur only in a small subset of cells.  
74 These rare transcripts should become detectable by deep sequencing and thus transcript coverage should increase  
75 with more reads available. This is indeed the case; however rarefaction curves and their projections reach  
76 saturation for each of the taxa (suppl. Table S6 and Figure S1). This observation argues against a significant amount  
77 of transcriptional noise in our data, since noise should lead to a continuous increase of coverage with sequencing  
78 depth, at least if noise is randomly distributed across the genome and across the cells of the tissue. Further, it rules  
79 out a possible problem with DNA contamination, as this would also be expected to rise with increasing sequencing  
80 depth.

81 We have further explored the rarefaction principle to assess whether adding more sequences or more taxa to the  
82 data set leads to higher transcriptomic coverage of the common genome. Taking all aggregated reads (including  
83 the additional deep sequencing data from brain) across all tissues for all taxa, saturation is reached at 78.5%  
84 coverage for sequencing depth (Figure 2D), but no saturation is reached with the number of taxa used here (Figure  
85 2E). Hence, adding more taxa within this phylogenetic framework, for example species and sub-species on the  
86 *Apodemus* branch, would predictably lead to increasingly higher transcriptomic coverage of the common genome,  
87 up to the entire genome when ~38 taxa were surveyed within the phylogeny (based on the intercept of the  
88 regression curve).

89 This analysis suggests that there may be no regions that are not transcribed at some point in phylogenetic time.  
90 However, genome annotations in a given species usually show an uneven distribution of transcripts; some regions  
91 harbor many clustered transcripts and other regions are nearly devoid of transcripts ("gene deserts"). We  
92 compared regions devoid of any transcriptomic coverage in our taxonomic sample to regions that show  
93 transcription in at least one sample. We find that transcribed regions are more abundant and larger on average  
94 than non-transcribed regions (Figure 2E). The maximum length of non-transcribed regions is ~ 20kb (at  $\geq 1$  reads)  
95 or ~50kb (at  $\geq 5$  reads), suggesting that large gene-free "deserts" are in principle accessible to transcription and

96 possible regulatory constraints<sup>25</sup> do not fully prevent their transcription. In fact, the mouse *de novo* gene *Pldi* has  
97 arisen within a gene desert<sup>10</sup>.

98 Most *de novo* transcripts are expected to be neutral, but some may turn into more stable proto-genes<sup>6,19</sup> that can  
99 eventually become functional, either as regulatory RNA, or by acquiring a functional reading frame. To identify  
100 candidate proto-genes we used algorithms that are able to reconstruct transcriptional islands and splice junctions  
101 (STAR<sup>26</sup>/cufflinks<sup>27</sup>) and join them into predicted gene models (suppl. Table S9). We did this for each taxon  
102 separately and assessed the gain and loss patterns of these transcripts in a phylogenetic context. Excluding all  
103 previously annotated transcripts, we find a total of 17,746 new candidate proto-genes, distributed across all taxa  
104 (suppl. Figure S2). When looking only at gains of proto-gene transcripts in the terminal branches, we find that  
105 about 1,300 new proto-genes are gained per million years (Figure 3A). Interestingly, at least 3,000 proto-genes are  
106 already present at the youngest divergence level, implying within-species polymorphism that was also described  
107 for *Drosophila*<sup>21</sup>.

108 When counting gains versus losses of proto-genes, we find again higher numbers gained than lost over short  
109 phylogenetic times. However, gains and losses balance out over longer evolutionary times when including the  
110 whole phylogeny and all annotated genes (Figure 3B). This pattern confirms the two essential predictions we made  
111 about *de novo* gene emergence: (1) newly acquired transcripts are not easily lost and thus have a life-time  
112 sufficient for evolutionary testing and (2) genes do not accumulate over time because gain and loss rates are  
113 balanced across longer time spans. Hence, when a given taxonomic lineage gains many *de novo* genes, it will lose  
114 some of its older genes.

115 Our analysis is conservative in several respects. First, we focused on poly-adenylated transcripts, thereby avoiding  
116 inclusion of RNA fragments that have been processed (i.e. excised introns) and randomly transcribed fragments.  
117 However, this means we also exclude RNAs which are not transcribed by RNA polymerase II, such as tRNAs,  
118 snRNAs and ribosomal RNAs. The human ENCODE data suggest that such non-poly-adenylated RNAs are abundant<sup>1</sup>  
119 and it is likely that proto-genes can arise from those transcripts as well, i.e. we are likely underestimating the  
120 proto-gene emergence rate. Second, we focused on three tissues and one developmental stage only. Although we  
121 included testis and brain, which are known to have the highest diversity of transcripts<sup>28</sup> we can also expect that  
122 including more tissues and developmental stages would further increase the transcriptomic coverage. Taking these  
123 factors into account, as well as the fact that increased taxonomic representation shows no signs of saturation with  
124 respect to transcriptomic coverage (Figure 2E), it seems reasonable to conclude that when measured at a  
125 phylogenetic time scale, the entire genome can become subject to transcription.

126 Pervasive transcription of the genome was noted soon after deep sequencing approaches became possible and  
127 this pattern was systematically explored in the ENCODE projects<sup>1,29</sup>. While the functional significance of pervasive  
128 transcription is a matter of continuous dispute<sup>4,5,30</sup>, our results provide an evolutionary dynamics perspective on

129 this question where emergence, functionalization and decay of gene functions should be seen as an evolutionary  
130 life cycle of genes<sup>8</sup>. *De novo* gene birth should no longer be considered as the result of unlikely circumstances, but  
131 rather a mechanism of testing genome regions for their adaptive potential. Within this evolutionary perspective,  
132 any part of the genome – “junk” DNA included – has the possibility to become useful.

133

134

## 135 References

- 136 1. Kellis, M. *et al.* Defining functional DNA elements in the human genome. *Proc. Natl. Acad. Sci.* **111**, 6131–6138  
137 (2014).
- 138 2. Kutter, C. *et al.* Rapid Turnover of Long Noncoding RNAs and the Evolution of Gene Expression. *PLoS Genet* **8**,  
139 e1002841 (2012).
- 140 3. Kapusta, A. & Feschotte, C. Volatile evolution of long noncoding RNA repertoires: mechanisms and biological  
141 implications. *Trends Genet.* **30**, 439–452 (2014).
- 142 4. Van Bakel, H., Nislow, C., Blencowe, B. J. & Hughes, T. R. Most ‘dark matter’ transcripts are associated with  
143 known genes. *PLoS Biol.* **8**, e1000371 (2010).
- 144 5. Clark, M. B., Amaral, P. P., Schlesinger, F. J., Dinger, M. E. & Taft, R. J. The reality of pervasive transcription.  
145 *PLoS Biol* **9**, e1000625 (2011).
- 146 6. Siepel, A. Darwinian alchemy: Human genes from noncoding DNA. *Genome Res.* **19**, 1693–1695 (2009).
- 147 7. Tautz, D. & Domazet- Loso, T. The evolutionary origin of orphan genes. *Nat Rev Genet* **12**, 692 – 702 (2011).
- 148 8. Neme, R. & Tautz, D. Evolution: Dynamics of De Novo Gene Emergence. *Curr. Biol.* **24**, R238–R240 (2014).
- 149 9. Levine, M. T., Jones, C. D., Kern, A. D., Lindfors, H. A. & Begun, D. J. Novel genes derived from noncoding DNA  
150 in *Drosophila melanogaster* are frequently X-linked and exhibit testis-biased expression. *Proc. Natl. Acad. Sci.*  
151 *U. S. A.* **103**, 9935–9939 (2006).
- 152 10. Heinen, T. J. A. J., Staubach, F., Häming, D. & Tautz, D. Emergence of a new gene from an intergenic region.  
153 *Curr. Biol. CB* **19**, 1527–1531 (2009).
- 154 11. Knowles, D. G. & McLysaght, A. Recent de novo origin of human protein-coding genes. *Genome Res* **19**, 1752 –  
155 1759 (2009).
- 156 12. Cai, J., Zhao, R., Jiang, H. & Wang, W. De Novo Origination of a New Protein-Coding Gene in *Saccharomyces*  
157 *cerevisiae*. *Genetics* **179**, 487–496 (2008).
- 158 13. Xie, C. *et al.* Hominoid-specific de novo protein-coding genes originating from long non-coding RNAs. *PLoS*  
159 *Genet.* **8**, e1002942 (2012).
- 160 14. Ruiz-Orera, J., Messeguer, X., Subirana, J. A. & Alba, M. M. Long non-coding RNAs as a source of new peptides.  
161 *eLife* **3**, e03523 (2014).
- 162 15. Chen, S., Zhang, Y. E. & Long, M. New Genes in *Drosophila* Quickly Become Essential. *Science* **330**, 1682–1685  
163 (2010).
- 164 16. Wu, X. & Sharp, P. A. Divergent Transcription: A Driving Force for New Gene Origination? *Cell* **155**, 990–996  
165 (2013).
- 166 17. Sundaram, V. *et al.* Widespread contribution of transposable elements to the innovation of gene regulatory  
167 networks. *Genome Res.* **24**, 1963–1976 (2014).
- 168 18. Wu, D.-D., Irwin, D. M. & Zhang, Y.-P. De Novo Origin of Human Protein-Coding Genes. *PLoS Genet* **7**,  
169 e1002379 (2011).

- 170 19. Carvunis, A. R., Rolland, T., Wapinski, I., Calderwood, M. A. & Yildirim, M. A. Proto-genes and de novo gene  
171 birth. *Nature* **487**, 370 – 374 (2012).
- 172 20. Neme, R. & Tautz, D. Phylogenetic patterns of emergence of new genes support a model of frequent de novo  
173 evolution. *BMC Genomics* **14**, 117 (2013).
- 174 21. Zhao, L., Saelao, P., Jones, C. D. & Begun, D. J. Origin and Spread of de Novo Genes in *Drosophila melanogaster*  
175 Populations. *Science* **343**, 769 (2014).
- 176 22. Palmieri, N., Kosiol, C. & Schlötterer, C. The life cycle of *Drosophila* orphan genes. *eLife* **3**, (2014).
- 177 23. Sedlazeck, F. J., Rescheneder, P. & von Haeseler, A. NextGenMap: fast and accurate read mapping in highly  
178 polymorphic genomes. *Bioinforma. Oxf. Engl.* **29**, 2790–2791 (2013).
- 179 24. Chinwalla, A. T. *et al.* Initial sequencing and comparative analysis of the mouse genome. *Nature* **420**, 520–562  
180 (2002).
- 181 25. Montavon, T. & Duboule, D. Landscapes and archipelagos: spatial organization of gene regulation in  
182 vertebrates. *Trends Cell Biol.* **22**, 347–354 (2012).
- 183 26. Dobin, A. *et al.* STAR: ultrafast universal RNA-seq aligner. *Bioinformatics* bts635 (2012).  
184 doi:10.1093/bioinformatics/bts635
- 185 27. Roberts, A., Pimentel, H., Trapnell, C. & Pachter, L. Identification of novel transcripts in annotated genomes  
186 using RNA-Seq. *Bioinformatics* **27**, 2325–2329 (2011).
- 187 28. Necsulea, A. & Kaessmann, H. Evolutionary dynamics of coding and non-coding transcriptomes. *Nat. Rev.*  
188 *Genet.* **15**, 734–748 (2014).
- 189 29. Yue, F., Cheng, Y., Breschi, A., Vierstra, J., Wu, W. *et al.* A comparative encyclopedia of DNA elements in the  
190 mouse genome. *Nature* **515**, 355–364 (2014).
- 191 30. Jensen, T. H., Jacquier, A. & Libri, D. Dealing with Pervasive Transcription. *Mol. Cell* **52**, 473–484 (2013).
- 192

### 193 **Supplementary information**

194 Supplementary\_files includes Tables S1-S7 and Figures S1 and S2. Supplementary\_TableS8 - Excel file with gain loss  
195 patterns of transcript coverage per branch of the phylogeny. Supplementary\_TableS9 - Excel file with list of all  
196 gene models and gain/loss pattern along branches.

### 197 **Acknowledgements**

198 We thank the C. Pfeifle and the mouse team for providing the animals, J. Altmüller and C. Becker for sequencing,  
199 B. Harr, A. Nolte, L. Pallares and L. Turner for comments on the manuscript and the members of our group for  
200 discussions and suggestions. Special thanks to F. Sedlazeck for bioinformatic advice and provision of software  
201 before publication. R.N. was supported by a PhD fellowship of the IMPRS for Evolutionary Biology during the initial  
202 phase of the project. The project was financed through an ERC advanced grant to D.T. (NewGenes - 322564).

### 203 **Author contribution**

204 DT and RN conceived the project, RN did the experimental work and data analysis, DT and RN discussed the data  
205 interpretation and wrote the manuscript.

206

## 207 **Methods online**

### 208 ***Origin of the sampled taxa***

209 We selected ten taxa, ranging from population level through sister genera (Figure 1 A).

210 The youngest divergence point sampled, at about 3,000 years, corresponds to the split between two European  
211 populations of *Mus musculus domesticus*<sup>1</sup> one from France (Massif Central = MC) and one from Germany  
212 (Cologne-Bonn area = CB)<sup>2</sup>. These European populations in turn have diverged from an ancestral *M. m. domesticus*  
213 population in Iran (Ahvaz = AH) about 12,000 years ago<sup>1</sup>. The European *M. m. domesticus* are also the closest  
214 relatives of the reference genome, the C57BL/6J strain<sup>3</sup>.

215 We included two populations of *Mus musculus musculus*; one from Austria (Vienna = WI) and one from Kazakhstan  
216 (Almaty = KH). These two populations are supposed to have a longer divergence between then the European *M. m.*  
217 *domesticus* populations, but a more accurate estimate is currently not available. We set the divergence for  
218 analyses at around 10,000 years as an approximate estimate.

219 *M. m. domesticus* has diverged from *M. m. musculus* and *Mus musculus castaneus* about 0.4 to 0.5 million years  
220 ago, with a subsequent divergence, not long after, between *M. m. musculus* and *M. m. castaneus*<sup>4</sup>. We included  
221 *M. m. castaneus* from Taiwan as a representative of the subspecies.

222 To account for longer divergence times, we included *Mus spicilegus* (estimated divergence of 1.2 million years);  
223 *Mus spretus* (estimated divergence of 1.7 million years)<sup>4</sup>; *Mus mattheyi* (subgenus *Nannomys*), the North African  
224 miniature mouse (estimated divergence of 6.6 million years)<sup>5,6</sup>, and *Apodemus uralensis*, the ural field mouse  
225 (estimated divergence of 10.6 million years)<sup>6</sup>.

226 The population-level samples (*M. m. domesticus* and *M. m. musculus*) included are maintained under outbreeding  
227 schemes, which allows for natural polymorphisms to be present in the samples. All other non-population samples  
228 are kept as more or less inbred stock, and therefore fewer polymorphisms are expected. All mice were obtained  
229 from the mouse collection at the Max Planck Institute for Evolutionary Biology, following standard rearing  
230 techniques which ensure a homogeneous environment for all animals. Mice were maintained and handled in  
231 accordance to FELASA guidelines and German animal welfare law (Tierschutzgesetz § 11, permit from Veterinäramt  
232 Kreis Plön: 1401-144/PLÖ-004697).

233 A total of 60 mice were sampled, as follows: Eight male individuals from each population-level sample (outbreds),  
234 Iran (AH), France (MC), and Germany (CB) of *Mus musculus domesticus*, and Austria (WI) and Kazakhstan (KH) of  
235 *Mus musculus musculus*. Four male individuals from the remaining taxa (partially inbred): *Mus musculus castaneus*  
236 (TA), *Mus spretus* (SP), *Mus spicilegus* (SC), *Mus mattheyi* (MA) and *Apodemus uralensis* (AP). Mice were sacrificed  
237 by CO<sub>2</sub> asphyxiation followed immediately by cervical dislocation. Mice were dissected and tissues were snap-  
238 frozen within 5 minutes post-mortem. The tissues collected were liver (ventral view: front right lobe), both testis  
239 and whole brain including brain stem.

### 240 ***Genome sequencing***

241 One individual from each of *M. spicilegus*, *M. mattheyi*, and *Apodemus uralensis* were selected for genome  
242 sequencing. DNA was extracted from liver samples. DNA extraction was performed using a standard salt extraction  
243 protocol. Tagged libraries were prepared using the Genomic DNA Sample preparation kit from Illumina, following  
244 the manufacturers' instructions: After library preparation, the three genome samples were pooled together and



245 run in a whole IlluminaHiSeq 2000 flow cell (8 lanes, approximately 2.6 lanes per sample). Library preparation and  
246 sequencing was performed at the Cologne Center for Genomics.

247 The genome from the strain SPRET/EiJ derived from *Mus spretus* was taken from <sup>7,8</sup>, and was downloaded from the  
248 European Nucleotide Archive (ENA) - accessions ERS076388 and ERS138732.

#### 249 **Transcriptome sequencing**

250 The sampled tissues of each taxon were used for RNA extraction with the RNAeasy Mini Kit (QUIAGEN) and pooled  
251 at equimolar concentrations. RNA quality was measured with the Agilent RNA Nano Kit, for the individual samples  
252 and pools. Samples with RIN values above 7.5 were used for sequencing. Library preparation was done using the  
253 Illumina TruSeq library preparation, with mRNA purification (PolyA selection), following manufacturers'  
254 instructions. Sequencing was done in Illumina HiSeq 2000 sequencer. Libraries for each group were tagged, pooled  
255 and sequenced in a single lane, corresponding to approximately one third of a HiSeq2000 lane. Additional  
256 sequencing of the brain samples was performed to identify potential limitations in depth of sequencing. For this,  
257 each brain library was sequenced on a full lane of a HiSeq2000. All library preparation and sequencing was done at  
258 the Cologne Center for Genomics (CCG).

#### 259 **Raw data processing**

260 All raw data files were trimmed for adaptors and quality using Trimmomatic <sup>9</sup>. The quality trimming was performed  
261 basewise, removing bases below quality score of 20 (Q20), and keeping reads whose average quality was of at  
262 least Q30. Reads whose trimmed length was shorter than 60 bases were excluded from further analyses, and pairs  
263 missing one member because of poor quality were also removed from any further analyses.

#### 264 **Mapping**

265 The reconstruction of transcriptomes using high-throughput sequencing data is not trivial when comparing  
266 information across different species to a single reference genome. This is due to the fact that most of the tools  
267 designed for such tasks do not work in a phylogenetically aware context. For this reason, any approximation which  
268 deals with fractional data (i.e. any high-throughput sequencing setup available to this date) is limited by the  
269 detection abilities of the software of choice and by the quality of the reference (transcriptome and genome).

270 Given the high quality state of the mouse genome repositories, we decided to take a reference-based approach, in  
271 which all analyses are centered in the reference genome of the C57BL/6 laboratory strain of *Mus musculus*  
272 *domesticus*. This enables direct comparisons across all species, with an obvious cost introduced by the mapping of  
273 distantly related genomes.

274 For general comparisons, transcriptome and genome sequencing reads were aligned against the mm10 version of  
275 the mouse reference genome from UCSC <sup>10</sup> using NextGenMap which performs extremely well with divergences of  
276 over 10% compared to other standard mapping software <sup>11</sup>. The program was run under default settings, except  
277 for --strata 1 and --silent-clip. The first option enforces uniquely mapping reads and the second drops the  
278 unmapped portion of the reads, to avoid inflating coverage statistics. This is particularly relevant around exon-  
279 intron boundaries, where exonic reads are forced into intronic regions unless this option is set.

280 Genomic reads were used to as empiric mapability, i.e. to identify which regions can be reliably detected. We  
281 limited our analyses to regions in the reference genome which could be mapped at least 5 times from genomic  
282 reads from all other species (5x coverage). This is the portion we call the 'common genome' in downstream  
283 analyses. It is important to highlight that this is not the same as synteny, since we did not perform any co-linearity  
284 analyses between fragments, but rather represents the mere presence in the species, in any possible order.



285 Furthermore having genomic reads enables the detection of true absences in transcriptional activity from absences  
286 of genome regions, which would show similar patterns in transcriptome-only analyses.

### 287 **Reconstruction of gene models**

288 Due to the fact that NextGenMap is unable to perform split read analyses we opted for more standard tools to  
289 reconstruct gene models from the data. For this we used STAR<sup>12</sup> to map reads to the reference, followed by  
290 cufflinks<sup>13</sup> to obtain automated gene and transcript annotations for each species. The annotation file contains  
291 models for expressed transcripts with splicing information (exon annotation) when available. All annotations were  
292 merged using cuffmerge to generate a final annotation that includes gene models present at least once in the total  
293 sample. Mono-exonic models shorter than 500 bases or contained within introns of multi-exonic transcripts were  
294 excluded from analyses.

### 295 **Parsimony gain and loss mapping**

296 We estimated gain and loss events given the phylogenetic distribution of presence and absence of transcription at  
297 a given position or for a given gene model using maximum parsimony (based on GLOOME,<sup>14</sup> the assumption that  
298 gains and losses are equally likely, and a fixed tree describing the relationships between taxa.

### 299 **Genome-wide estimation of transcriptional gains and losses**

300 Genome-wide estimates of gain and loss of transcription were done at the nucleotide level, considering only  
301 regions within the common genome.

302 Normalized versions of each set of aligned reads were generated by subsampling (samtools view -s x<sup>15</sup>; where x is  
303 the proportion of each individual sample that matches the least abundant sample). Normalization was done only  
304 across tissues and not between them. Normalized samples were merged at the species level to obtain a species-  
305 wide transcription sample. Aligned reads in BAM format were converted to BedGraph format for phylogenetic  
306 comparisons of format using bedtools<sup>16</sup>. Two parallel sets of comparisons were made: i) using all coverage  
307 information from uniquely mapping reads, thus representing 'absolute' (minus normalization) coverage, and ii)  
308 using a threshold of at least 5 uniquely mapped reads, thus representing 'stringent' coverage. Coverage files were  
309 compared between groups using multiIntersectBed<sup>16</sup>, to obtain the portions shared between all possible  
310 combinations.

311 Each possible combination can be also interpreted as a binary presence/absence pattern. We summarized the total  
312 amount of nucleotides in each specific pattern. Each pattern received a fixed amount of gains and losses,  
313 consistent with the parsimony assumptions using GLOOME<sup>14</sup> in maximum parsimony mode. For example, the  
314 pattern that indicates presence in German *M. m. domesticus* (CB), but absence in all other groups, corresponds to  
315 one very recent gain and zero losses. The pattern that indicates presence in German and Iranian *M. m. domesticus*  
316 (CB and AH), but absence in all other groups, corresponds to one gain (ancestor of *M. m. domesticus*) and one loss  
317 (after divergence of French *M. m. domesticus*). In this context, we identify monophyletic gains as stable, i.e.  
318 transcription is present in all derived groups after estimated gain, and unstable, i.e. transcription lost in at least  
319 one derived group after gain.

### 320 **Gene gain and loss rates from gene models**

321 Gene models derived from STAR alignments and cufflinks reconstructions were used to calculate the rate at which  
322 gene-like entities are gained or lost along the phylogeny. A single unified annotation for all species was generated  
323 with cuffmerge (see "Gene model reconstruction" above) and FPKM values were obtained from mapped reads for  
324 each tissue and species. FPKM of 0.1 was set as a threshold to define the presence or absence of a gene model in a

325 given sample. Similar to the reconstruction of genome-wide patterns, a maximum parsimony framework was  
326 employed, assuming that gains and losses have equal probabilities of occurrence.

327 Rates of gain and loss of gene models were estimated from linear regressions between time and gain or loss using  
328 R, with the `lm()` function from the stats package<sup>17</sup>. Rates were calculated for each tissue and each possible  
329 combination of tissues (a gene can be differentially present or absent in a species), to obtain tissue-specific gains  
330 and losses of models.

### 331 ***Reconstruction of phylogenetic relationships***

332 Using a manhattan distance matrix from the summarized transcriptional coverage (suppl. Table S8), we  
333 constructed a neighbor-joining (NJ) tree that describes the proximity between any two taxa based on the shared  
334 transcriptomic coverage between them. In this representation, closely related organisms have more shared  
335 transcriptomic coverage than distantly related organisms. Analyses were performed in R, using the function `dist()`  
336 from the stats package and `nj()` from the ape package<sup>18</sup>.

337 Additionally, whole mitochondrial genomes were obtained for each taxon as consensus sequences from mapped  
338 reads using samtools `mpileup`<sup>15</sup>. The sequences were aligned with MUSCLE<sup>19</sup>, and a NJ tree was constructed with  
339 the `dist.dna()` and `nj()` functions from the ape package<sup>18</sup>. All NJ trees were tested with 1000 bootstraps with the  
340 `boot.phylo()` function from the ape package<sup>18</sup>. Reported trees have a support of 60% or greater.

### 341 ***Rarefaction and subsampling***

342 Transcriptome experiments tend to be limited by the depth of sequencing, with highly expressed genes being  
343 relatively easy to sample, and rare transcripts becoming increasingly difficult to find. Given the large amount of  
344 data generated, we investigated if our data shows signals of coverage saturation from subsets of the data of  
345 different sizes. The total experiment, comprising ten taxa, corresponds to  $6.4 \times 10^9$  reads (or 6.4 billion reads). We  
346 subsampled (samtools `view -s`) portions of mapped reads for each taxon, ranging between 10% to 90%, at 10%  
347 intervals. The observation of coverage saturation in this case would indicate that our sequencing efforts likely  
348 cover most of the transcribed regions of the common genome.

349 In parallel, we estimated the individual and combined contribution of each taxon to the transcriptomic coverage of  
350 the common genome. Not all samples have the same phylogenetic distance to each other (some species have  
351 more representatives than others). To account for this we generated one hundred arrays of the ten taxa with  
352 random order, and recorded the coverage after the addition of each taxon in each array. The observation of  
353 coverage saturation in this setup would indicate that taxonomic sampling is sufficient to cover most of the  
354 potentially transcribed regions of the common genome. In order to estimate whether our data continued to  
355 increase or approached saturation, we tested two alternative models: a generalized linear model with logarithmic  
356 behavior (ever increasing) or a self-starting nonlinear regression model (saturating). Best fit was decided based on  
357 the lowest AIC and BIC values. Analyses were performed in R, using the functions `glm()`, `nls()`, `SSasympt()`, `BIC()` and  
358 `AIC()` from the stats package<sup>17</sup>.

### 359 ***Analysis of transcribed and non-transcribed regions across the genome***

360 Transcribed and non-transcribed regions larger than 100 nucleotides were defined by the continuous presence or  
361 absence of transcriptomic coverage from mapping information of each taxon and tissue. Combined transcribed  
362 regions across species were obtained as mentioned before, and combined non-transcribed regions across species  
363 were generated by subtracting transcribed regions from the common genome.

364 **References for Methods online**

- 365 1. Cucchi, T., Vigne, J.-D. & Auffray, J.-C. First occurrence of the house mouse (*Mus musculus domesticus*  
366 Schwarz & Schwarz, 1943) in the Western Mediterranean: a zooarchaeological revision of subfossil  
367 occurrences. *Biol. J. Linn. Soc.* **84**, 429–445 (2005).
- 368 2. Ihle, S., Ravaoarimanana, I., Thomas, M. & Tautz, D. An analysis of signatures of selective sweeps in natural  
369 populations of the house mouse. *Mol. Biol. Evol.* **23**, 790–797 (2006).
- 370 3. Didion, J. P. & de Villena, F. P.-M. Deconstructing *Mus gemischus*: advances in understanding ancestry,  
371 structure, and variation in the genome of the laboratory mouse. *Mamm. Genome Off. J. Int. Mamm. Genome*  
372 *Soc.* **24**, 1–20 (2013).
- 373 4. Suzuki, H. *et al.* Evolutionary and dispersal history of Eurasian house mice *Mus musculus* clarified by more  
374 extensive geographic sampling of mitochondrial DNA. *Heredity* **111**, 375–390 (2013).
- 375 5. Catzeflis, F. M. & Denys, C. The African *Nannomys* (Muridae): An early offshoot from the *Mus* lineage -  
376 evidence from scnDNA hybridization experiments and compared morphology. *Isr. J. Zool.* **38**, 219–231 (1992).
- 377 6. Lecompte, E. *et al.* Phylogeny and biogeography of African Murinae based on mitochondrial and nuclear gene  
378 sequences, with a new tribal classification of the subfamily. *BMC Evol. Biol.* **8**, 199 (2008).
- 379 7. Keane, T. M. *et al.* Mouse genomic variation and its effect on phenotypes and gene regulation. *Nature* **477**,  
380 289–294 (2011).
- 381 8. Yalcin, B., Adams, D. J., Flint, J. & Keane, T. M. Next-generation sequencing of experimental mouse strains.  
382 *Mamm. Genome* **23**, 490–498 (2012).
- 383 9. Lohse, M. *et al.* RobiNA: a user-friendly, integrated software solution for RNA-Seq-based transcriptomics.  
384 *Nucleic Acids Res.* **40**, W622–627 (2012).
- 385 10. Fujita, P. A., Rhead, B., Zweig, A. S., Hinrichs, A. S. & Karolchik, D. The UCSC Genome Browser database:  
386 update 2011. *Nucleic Acids Res* **39**, D876 – D882 (2011).
- 387 11. Sedlazeck, F. J., Rescheneder, P. & von Haeseler, A. NextGenMap: fast and accurate read mapping in highly  
388 polymorphic genomes. *Bioinforma. Oxf. Engl.* **29**, 2790–2791 (2013).
- 389 12. Dobin, A. *et al.* STAR: ultrafast universal RNA-seq aligner. *Bioinformatics* bts635 (2012).  
390 doi:10.1093/bioinformatics/bts635
- 391 13. Roberts, A., Pimentel, H., Trapnell, C. & Pachter, L. Identification of novel transcripts in annotated genomes  
392 using RNA-Seq. *Bioinformatics* **27**, 2325–2329 (2011).
- 393 14. Cohen, O., Ashkenazy, H., Belinky, F., Huchon, D. & Pupko, T. GLOOME: gain loss mapping engine.  
394 *Bioinformatics* **26**, 2914–2915 (2010).
- 395 15. Li, H. *et al.* The Sequence Alignment/Map format and SAMtools. *Bioinforma. Oxf. Engl.* **25**, 2078–2079 (2009).
- 396 16. Quinlan, A. R. & Hall, I. M. BEDTools: a flexible suite of utilities for comparing genomic features. *Bioinformatics*  
397 **26**, 841–842 (2010).
- 398 17. R Core Team. *R: A language and environment for statistical computing.* (R Foundation for Statistical  
399 Computing, Vienna, Austria, 2014). at <<http://www.R-project.org/>>
- 400 18. Paradis, E., Claude, J. & Strimmer, K. APE: Analyses of Phylogenetics and Evolution in R language.  
401 *Bioinformatics* **20**, 289–290 (2004).
- 402 19. Edgar, R. C. MUSCLE: multiple sequence alignment with high accuracy and high throughput. *Nucleic Acids Res.*  
403 **32**, 1792–1797 (2004).
- 404

405

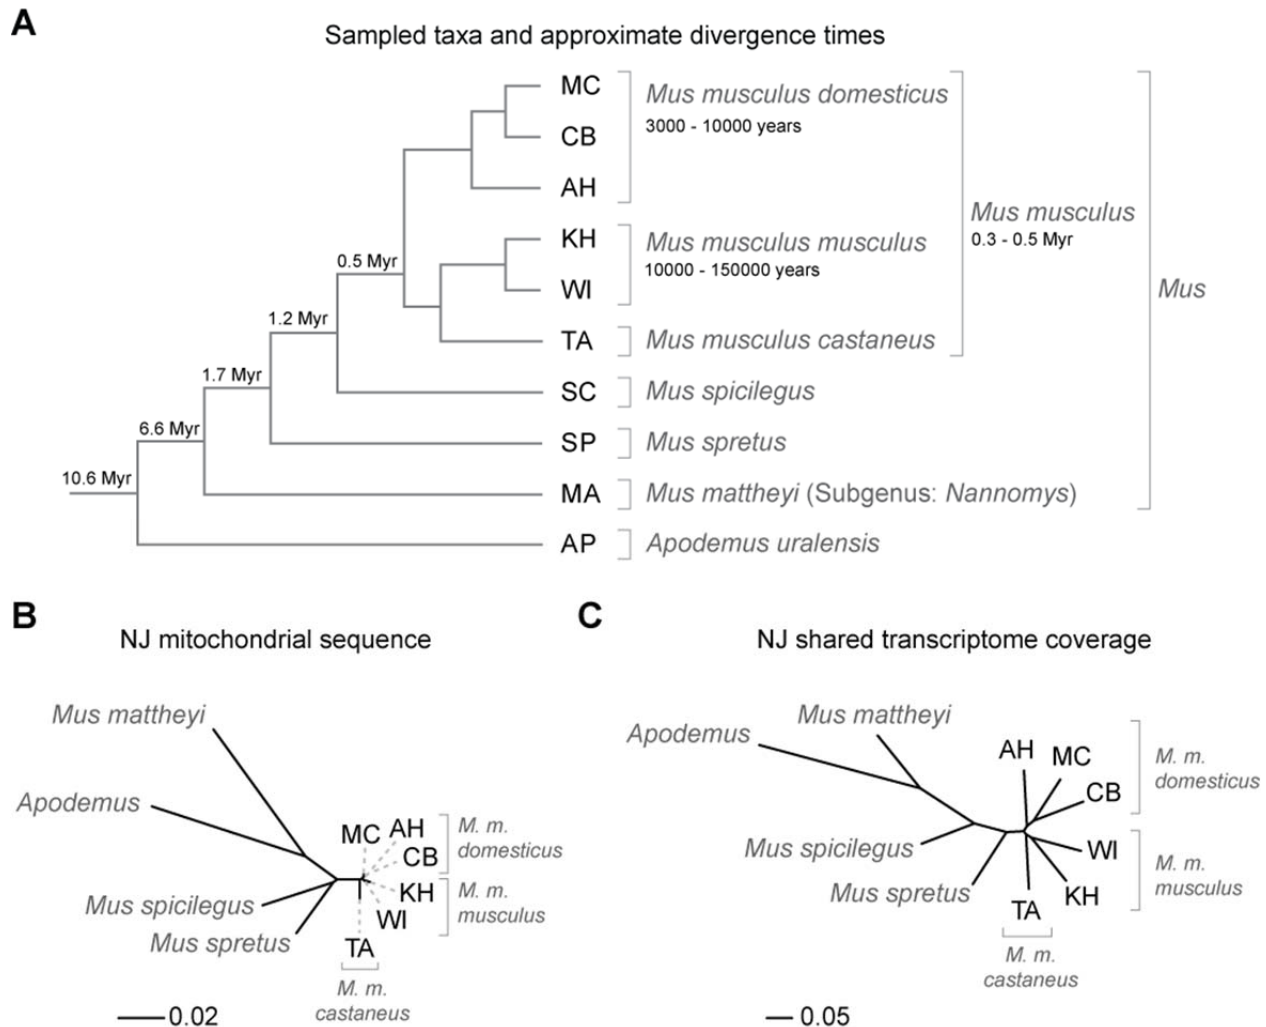

406

407

408

409 **Figure 1.** (A) Schematic relationships and approximate divergence times (see Methods) of the taxa under study.

410 Tree branches are not shown to scale. (B) Molecular phylogeny based on whole mitochondrial genome sequences

411 as a measure of molecular divergence (black lines represent the branch lengths, dashed lines serve to highlight

412 short branches). (C) Tree based on shared transcriptome coverage of the genome. The percentage of shared

413 transcripts mirrors the phylogenetic relationships between the studied taxa. MC: *M. m. domesticus* from France.

414 CB: *M. m. domesticus* from Germany. AH: *M. m. domesticus* from Iran. KH: *M. m. musculus* from Kazakhstan. WI:

415 *M. m. musculus* from Austria. TA: *M. m. castaneus* from Taiwan.

416

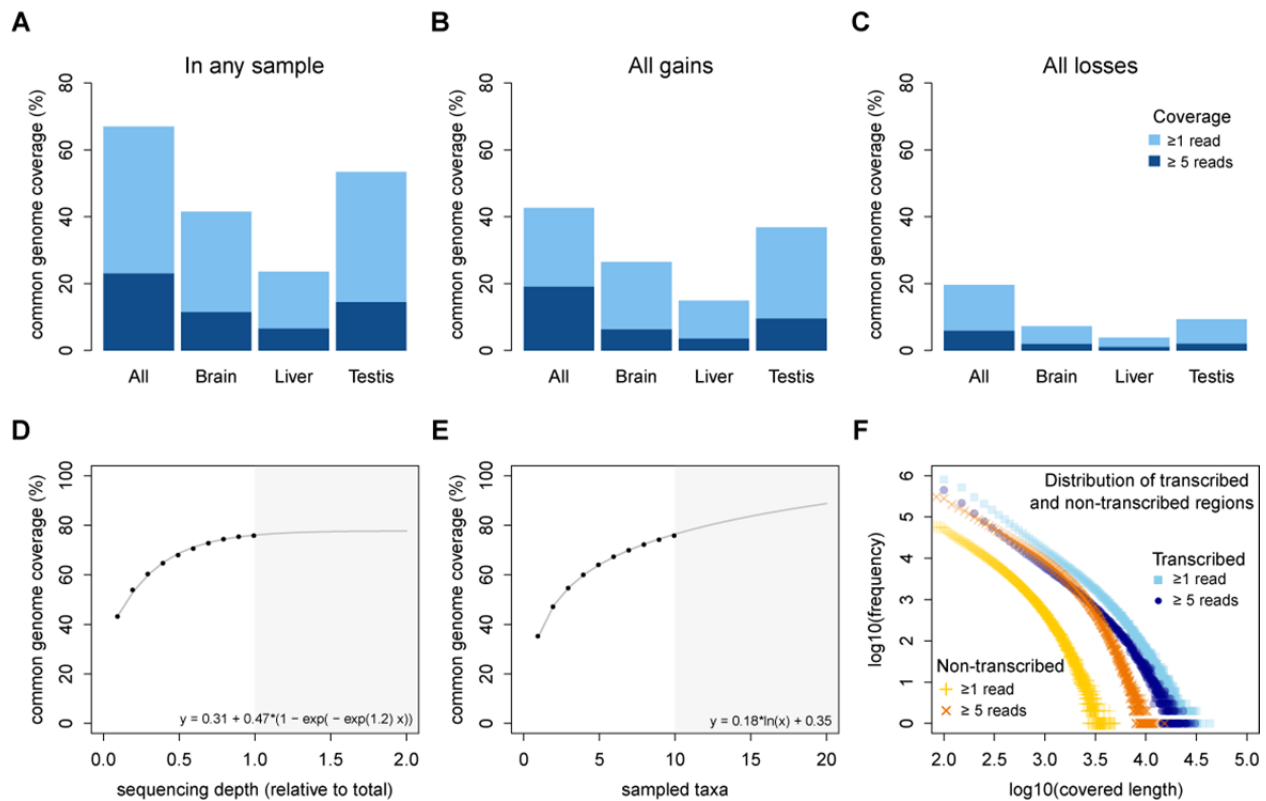

417

418

419

420 **Figure 2.** Coverage and phylogenetic turnover of base-wise transcription of the common genome. (A) Coverage  
 421 across all taxa based on similar sequencing depth for each tissue (suppl. Table xx). (B, C) All gains (B) and all losses  
 422 (C) along the phylogeny, assuming maximum parsimony (equal gain and loss probability). Light blue represents  
 423 regions with base-wise coverage of least one uniquely mapping read, dark blue represents regions of base-wise  
 424 coverage of at least five uniquely mapping reads. (D, E) Rarefaction, subsampling and saturation patterns using all  
 425 available samples, including deeper sequencing of the brain samples. (D) sequencing depth saturation as estimated  
 426 from a non-linear regression with asymptotic behavior, (E) sequencing depth saturation as estimated from an  
 427 increase in the number of taxa. Black dots indicate increases per sub-sampled sequence fraction or taxon added  
 428 from our dataset. Gray line indicates the predicted behavior from the indicated regression, and gray area shows  
 429 the prediction after doubling the current sampling either in sequencing effort (D) or additional taxa (E). Each  
 430 analysis was tested for logarithmic and asymptotic models and best fit was selected by AIC and BIC (see Methods).  
 431 Standard deviations are too small to become visible in the plots. (F) Comparative analysis of lengths of regions  
 432 transcribed or not transcribed across all data (including deeper brain sequencing) in all samples. Size distribution of  
 433 regions not covered in any transcript (yellow) or with less of five transcripts (orange) compared to size distribution  
 434 of regions with at least one transcript (light blue) or at least five transcripts (dark blue).

435

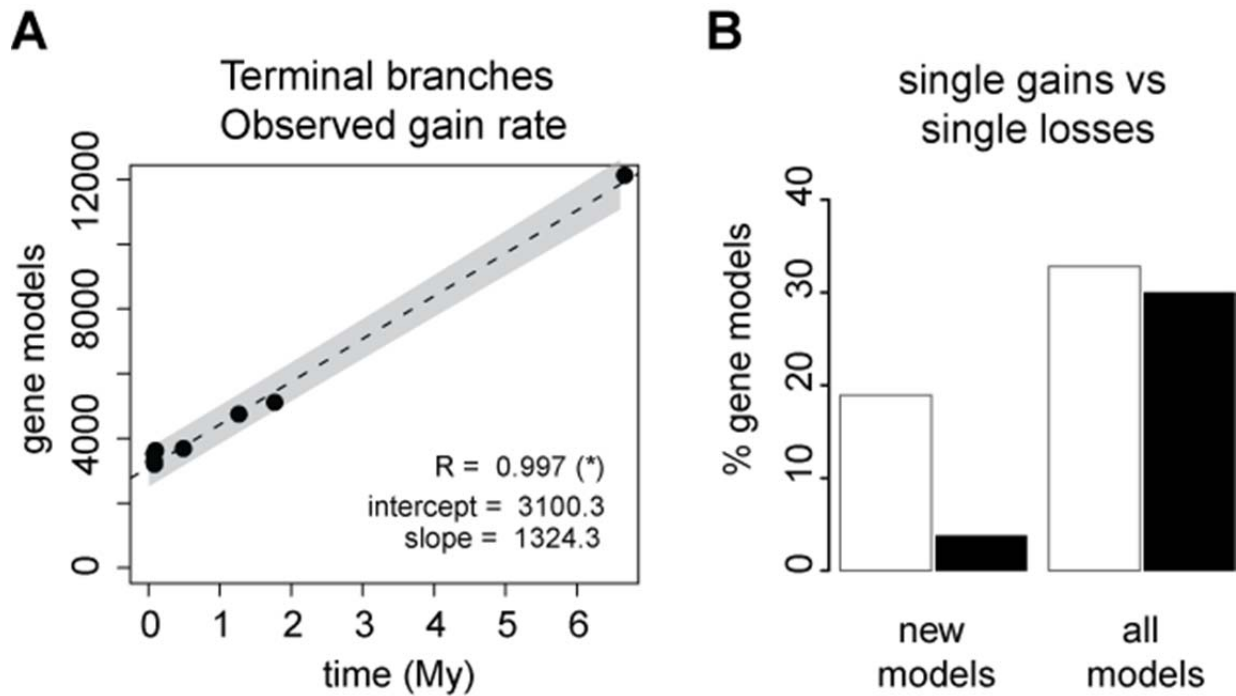

436

437

438

439 **Figure 3:** Turnover of proto-gene candidates. (A) Linear regression of observed gains across the phylogeny, using  
440 *Apodemus* as outgroup, and counting only gains in terminal branches. Regression coefficient is significant at  $p <$   
441 0.01. The grey area shows the 95% confidence interval of the regression. (B) Single gains versus single losses of a  
442 proto-gene candidate, for 'new' gene models, i.e. absent in *Apodemus*, and versus all detected models, i.e.  
443 including the whole gene set. The ratio of gain to loss of new models is significantly different from the observed for  
444 all models (Fisher's exact test,  $p < 0.01$ ).

445
